# Supplementary material
Source: JCI journal article supplement (doi:10.1172/jci192981)
Supplement: sd1 [file 1]

# Supplemental contents

Supplemental Fig. 1-Scanning electron microscopy of particles used in the study

Supplemental Fig. 2-Pleural fibrosis after intrapleural particle challenge

Supplemental Fig. 3-Inflammatory responses to intrapleural particle challenge

Supplemental Fig. 4-Effectiveness of pleurodesis for HAM and talc

Supplemental Fig. 5-Body weight after pleurodesis for malignant pleural effusion

Supplemental Fig. 6-Clearance of particles after intrapleural instillation of HAM and talc.

Supplemental Fig. 7-Serum levels of calcium and phosphate after intrapleural particle challenge

Supplemental Fig. 8-Physiologic effects of pleurodesis

Supplemental Fig. 9-Size dependence of intrapleural HAM associated weight loss and dissemination.

Supplemental Fig. 10-Dose dependence of intrapleural HAM associated wt loss, adhesion formation and dissemination formation.

Supplemental Fig. 11-Time dependent clearance of disseminated HAM particles.

Supplemental Fig. 12-Sex differences in body weight change and pleurodesis scores.

Supplemental Table 1-HAM and talc particle sizes measured by scanning electron microscopy

Supplemental Table 2-HAM and talc dose calculations

Supplemental Table 3-Reagents used

Supplemental Table 4-Primers used for qRT-PCR

# Supplemental Fig. 1.

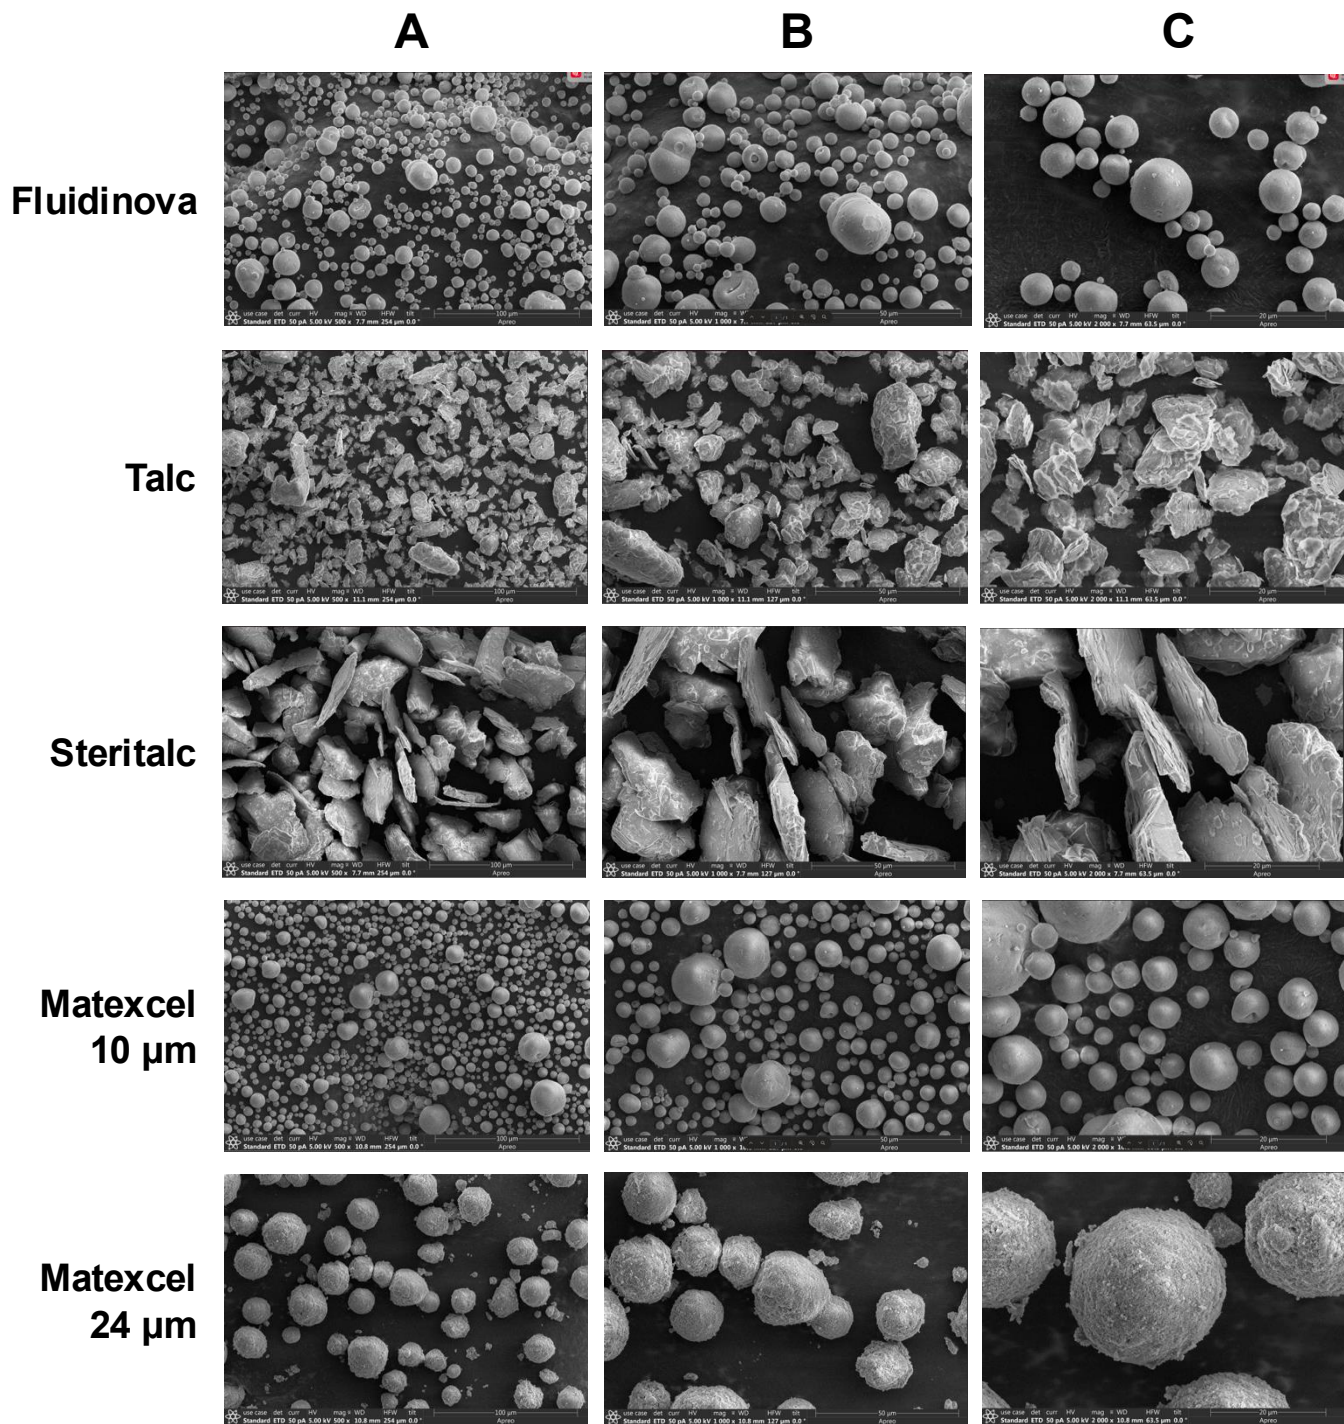

**Supplemental Fig. 1. Scanning electron microscopy of particles used in the study.** Scale bars of columns A,B, and C are 100 μm, 50 μm and 20 μm, respectively.

## Supplemental Figure 2(corresponds to Fig 1)

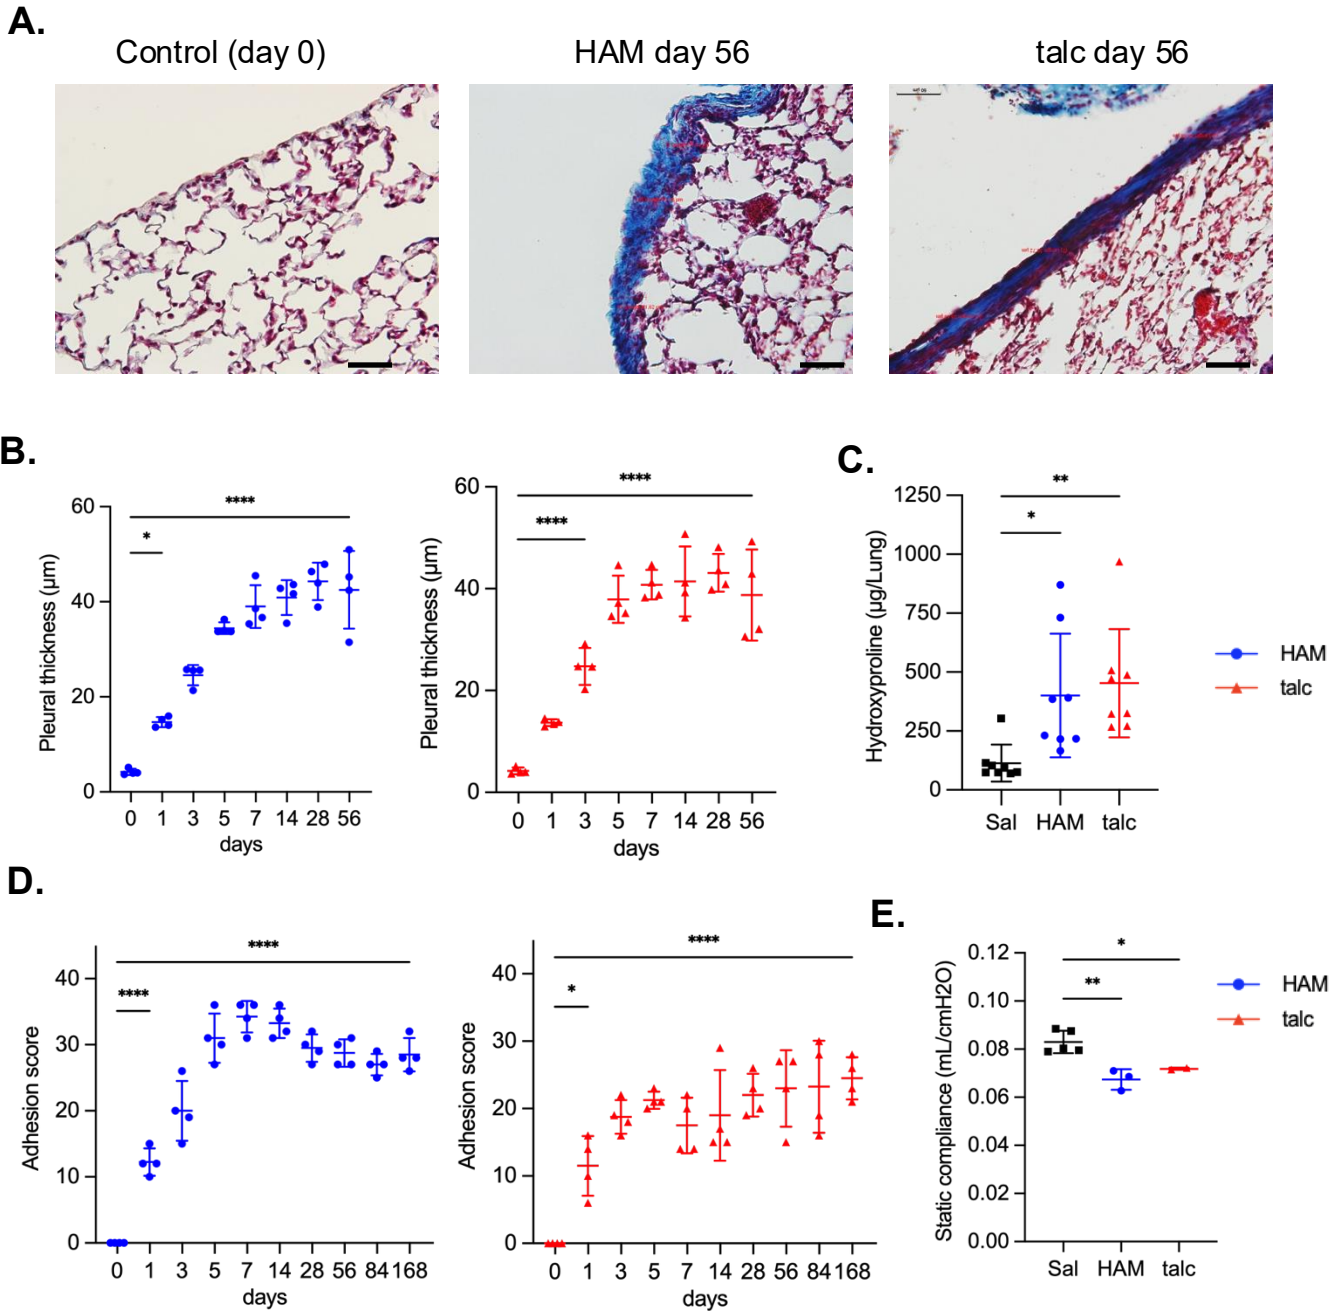

**Supplemental Fig. 2-Pleural fibrosis after intrapleural particle challenge.** **A.** Masson's Trichrome stained sections of lungs harvested from control mice and at day 56 after intrapleural challenge with HAM or talc. Shown at low magnification to demonstrate pleural fibrosis and the absence of parenchymal fibrosis. (Scale bar, 50  $\mu\text{m}$ ) **B.** Pleural thickness after HAM (blue) or talc (red) particle challenge in individual mice corresponding to Fig. 1D. **C.** Whole lung hydroxyproline from particle challenged mice, corresponding lung surface hydroxyproline in Fig. 1E. **D.** Adhesion scores after HAM (blue) or talc (red) pleurodesis, corresponding to Fig. 1F. **E.** Static compliance at day 56 post HAM or talc pleurodesis. Comparisons were by one-way analysis of variance (ANOVA) followed by Tukey's method for multiple group comparisons. Data are mean  $\pm$  SD. \* $P < 0.05$ , \*\* $P < 0.01$ , \*\*\* $P < 0.001$  and \*\*\*\* $P < 0.0001$ .

## Supplemental Figure 3 (corresponds to Fig 2)

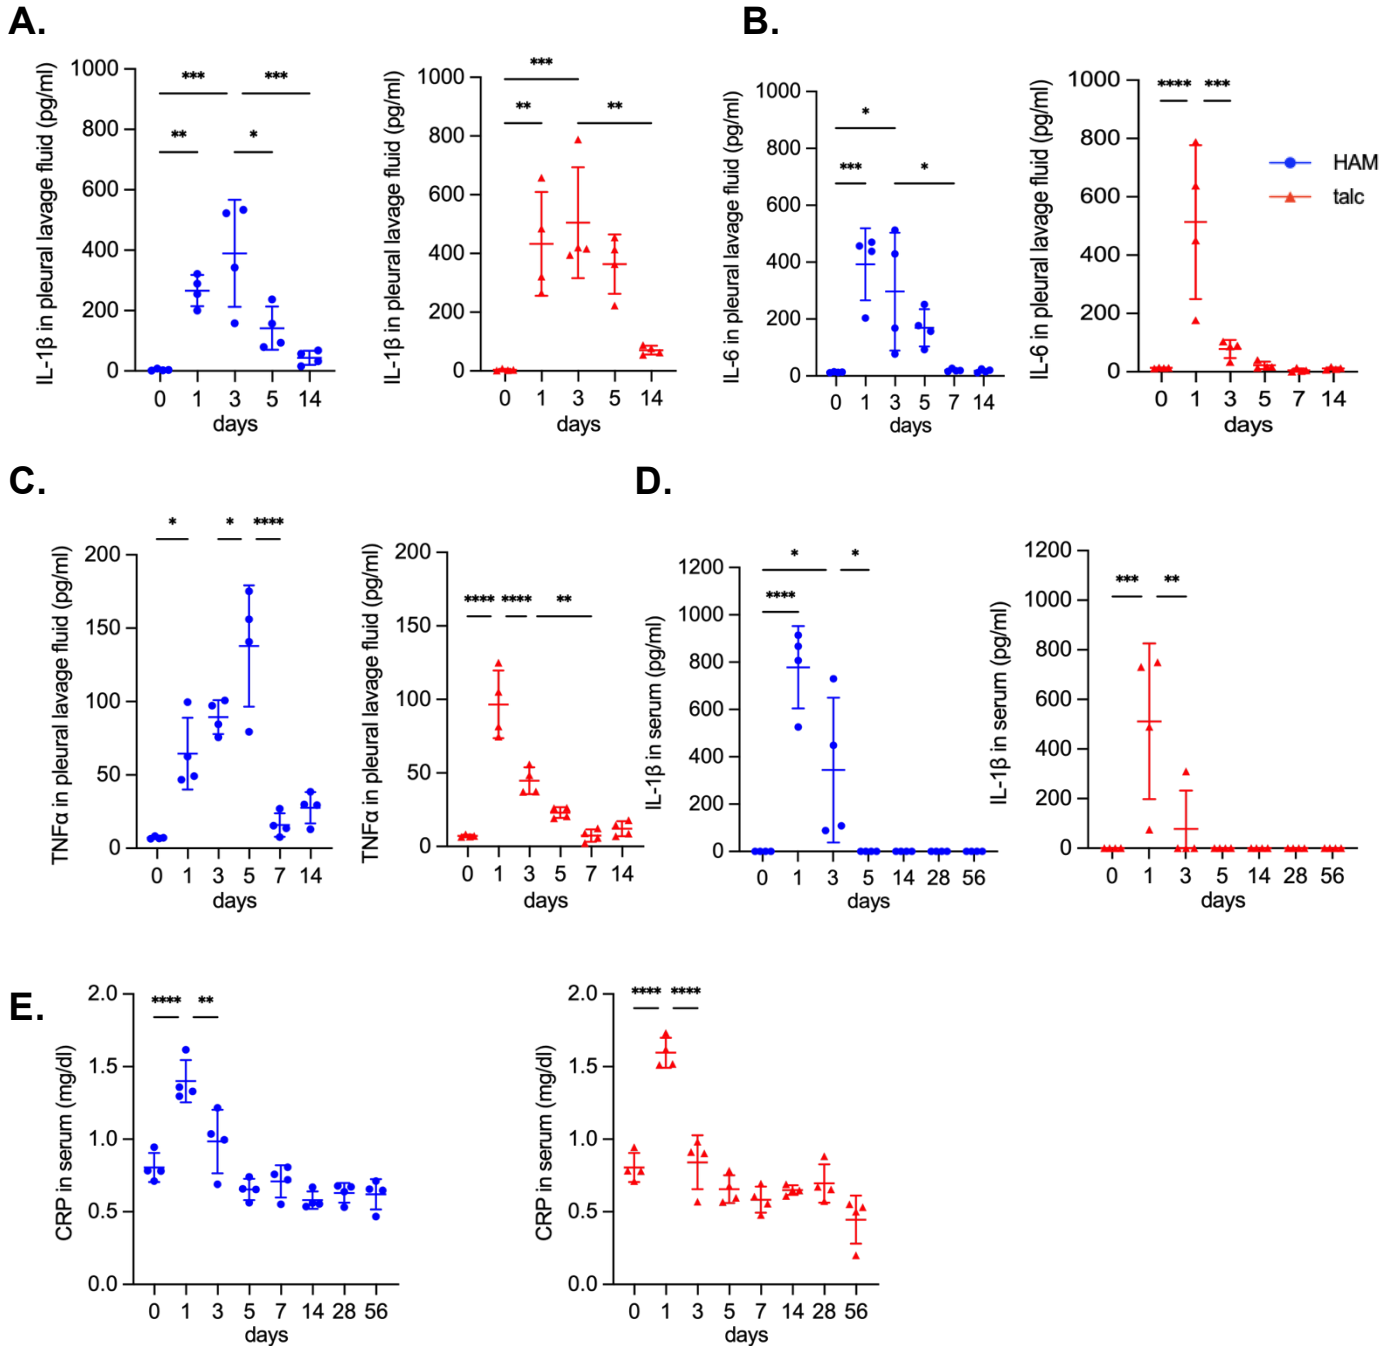

**Supplemental Fig. 3. Inflammatory responses to intrapleural particle challenge.** (A-C) Pleural lavage fluid and (D,E) serum cytokines from individual mice treated with intrapleural HAM and talc, corresponding to Figs. 2A-C and 2 D-E, respectively. Data are mean  $\pm$  SD. Comparisons were by one-way analysis of variance (ANOVA) followed by Tukey's method for multiple group comparisons. \* $P$  < 0.05, \*\* $P$  < 0.01, \*\*\* $P$  < 0.001 and \*\*\*\* $P$  < 0.0001.

## Supplemental Figure 4 (corresponds to Fig 5)

### HAM

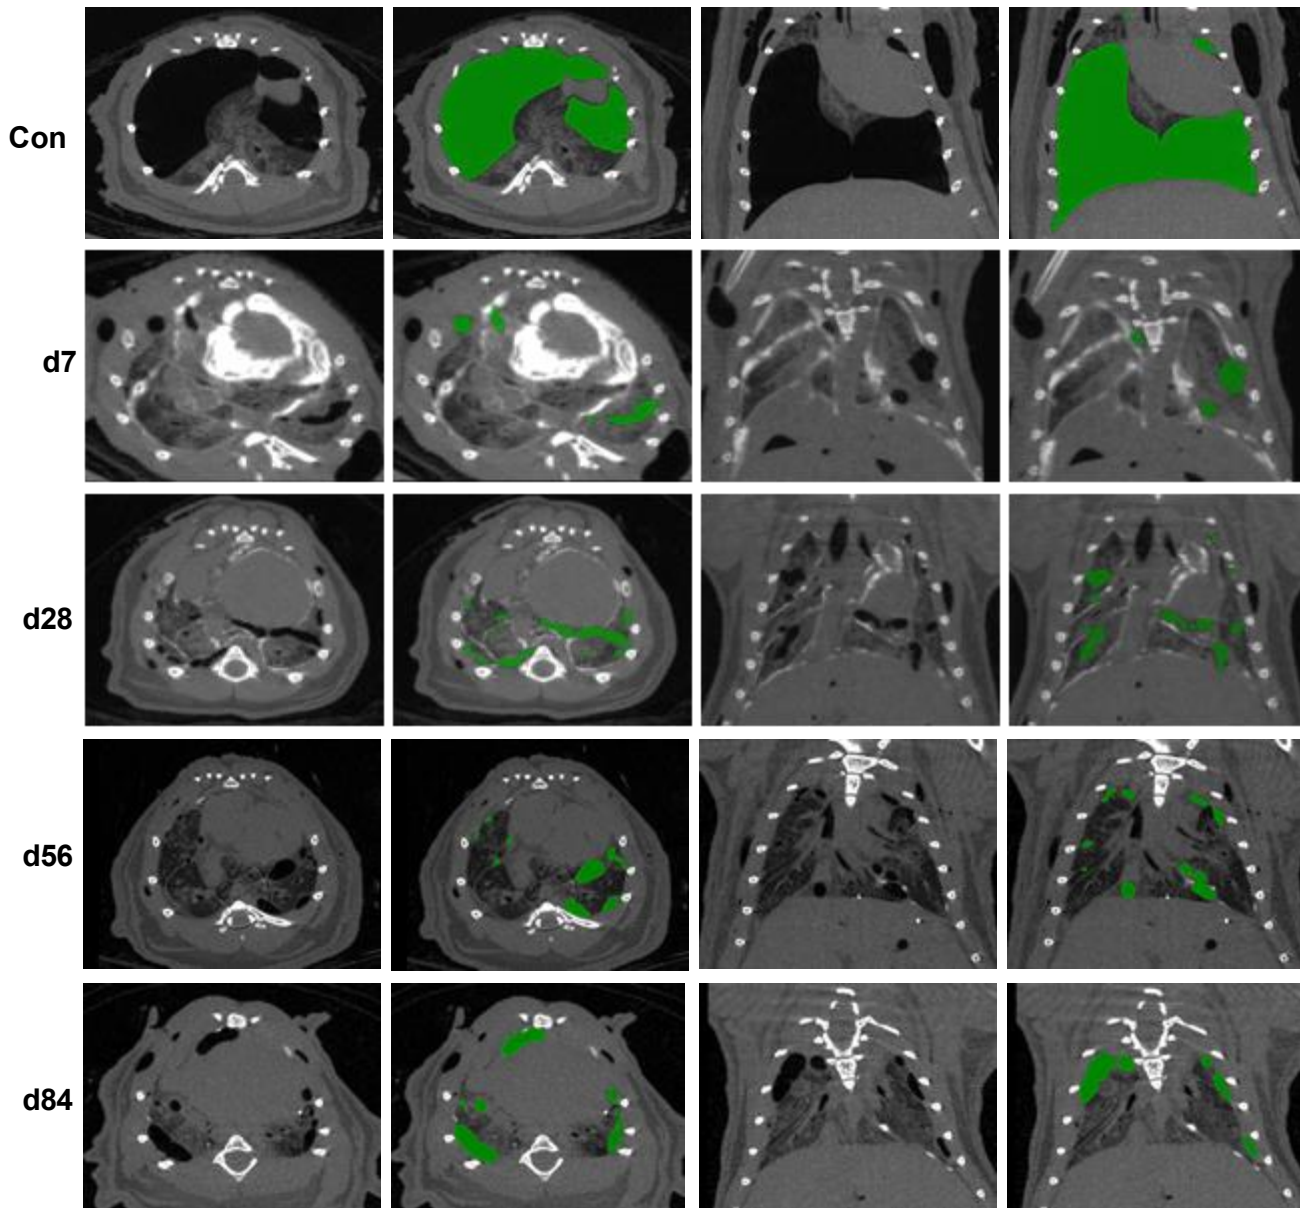

**Supplemental Fig. 4A. Effectiveness of HAM pleurodesis.** Axial and coronal unadulterated and companion colorized (to highlight intrapleural air) microCT images obtained at the indicated time points after intrapleural HAM administration, and following postmortem TTNP to induce pneumothorax. Corresponds to Figure 5.

## Supplemental Figure 4 (corresponds to Fig 5)

**talc**

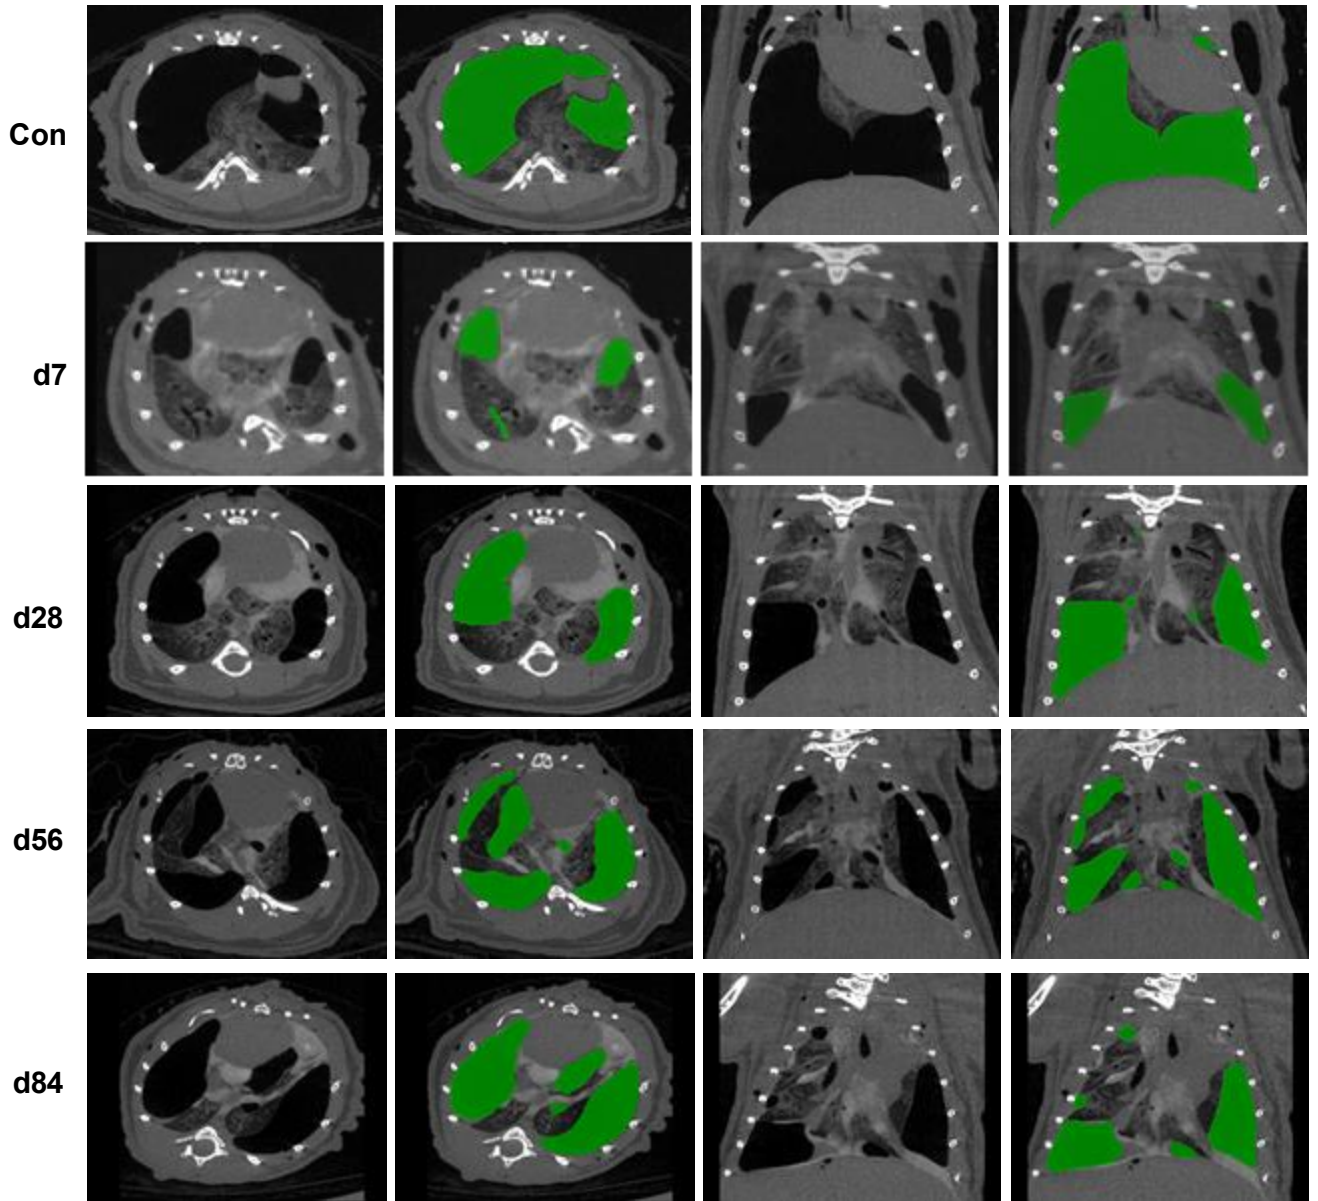

**Supplemental Fig 4B. Effectiveness of talc pleurodesis.** Axial and coronal unadulterated and companion colorized (to highlight intrapleural air) microCT images obtained at the indicated time points after intrapleural talc administration, and following postmortem TTNP to induce pneumothorax. Corresponds to Figure 5.

## Supplemental Figure 5 (corresponds to Fig 6)

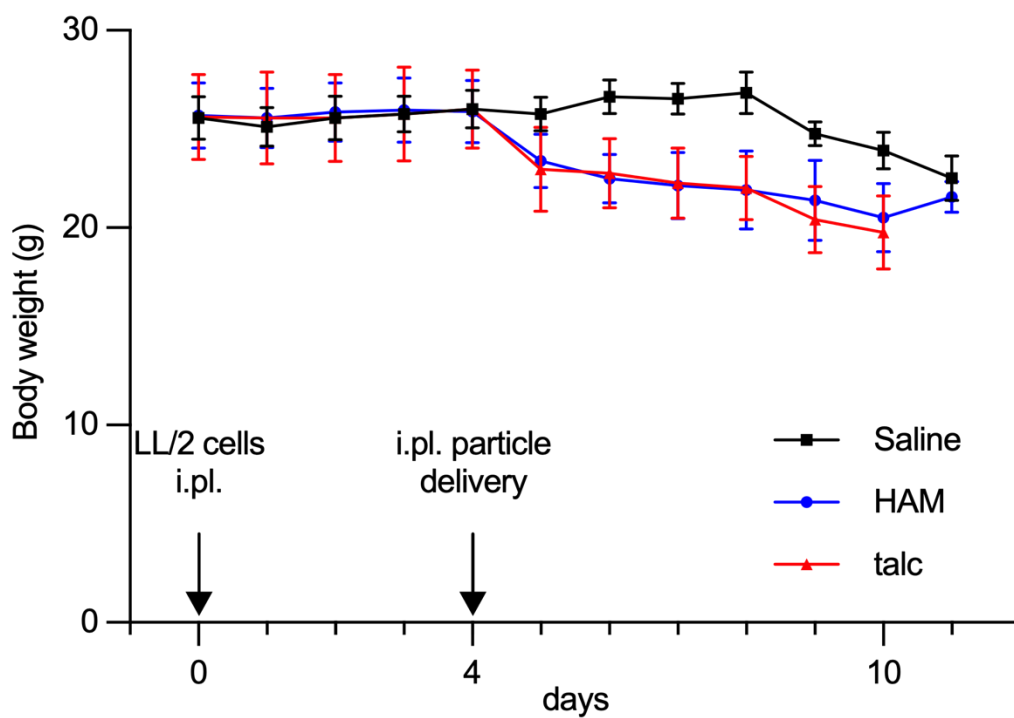

**Supplemental Fig 5. Body weight after pleurodesis for malignant pleural effusion.** Change in body weight (in grams) over time after intrapleural instillation of LL/2 cells followed by HAM or talc, corresponding to Figure 6. Data are mean  $\pm$  SD.

## Supplemental Figure 6A (corresponds to Fig 7)

### HAM

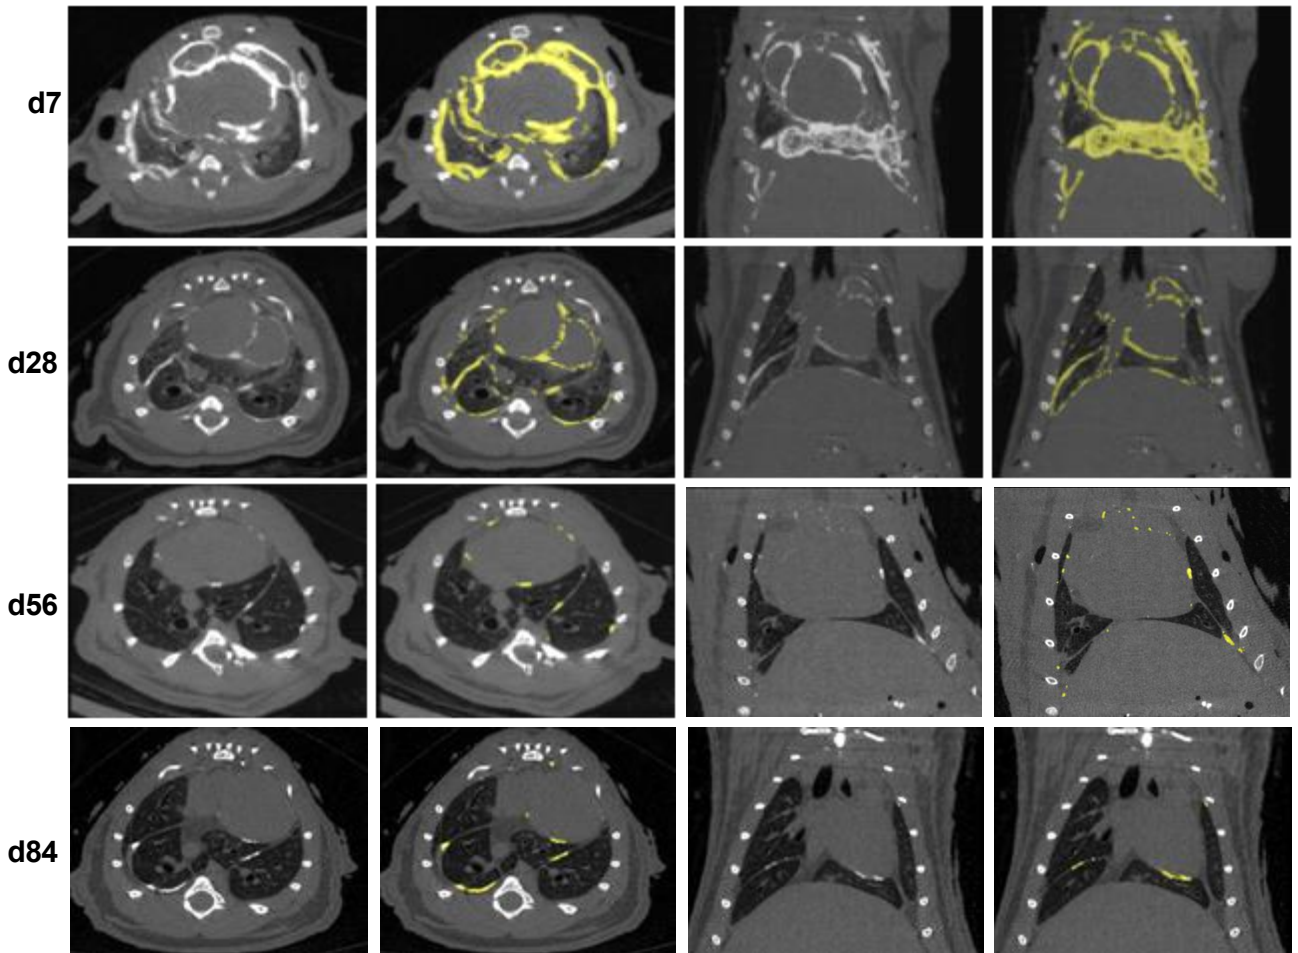

**Supplemental Fig 6A. Clearance of HAM particles after intrapleural instillation.** Axial and coronal unadulterated and companion colorized (to highlight HAM particles) microCT images obtained at the indicated time points after intrapleural HAM administration, corresponding to Figure 7.

## Supplemental Figure 6B (corresponds to Fig 7)

**talc**

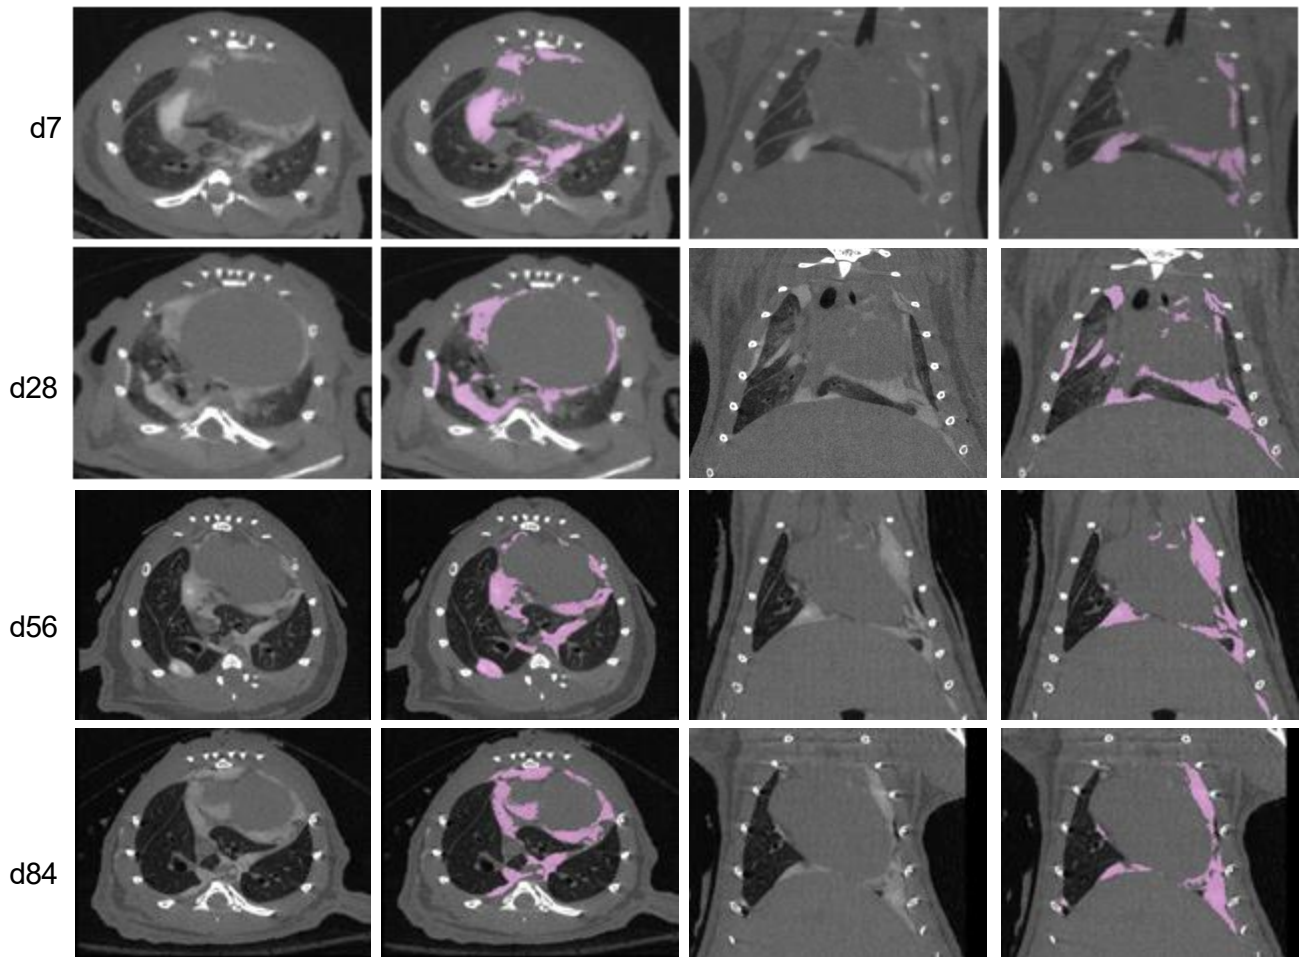

**Supplemental Fig. 6B. Clearance of talc particles after intrapleural instillation.** Axial and coronal unadulterated and companion colorized (to highlight talc particles) microCT images obtained at the indicated time points after intrapleural talc administration, corresponding to Figure 7.

## Supplemental Figure 7

A.

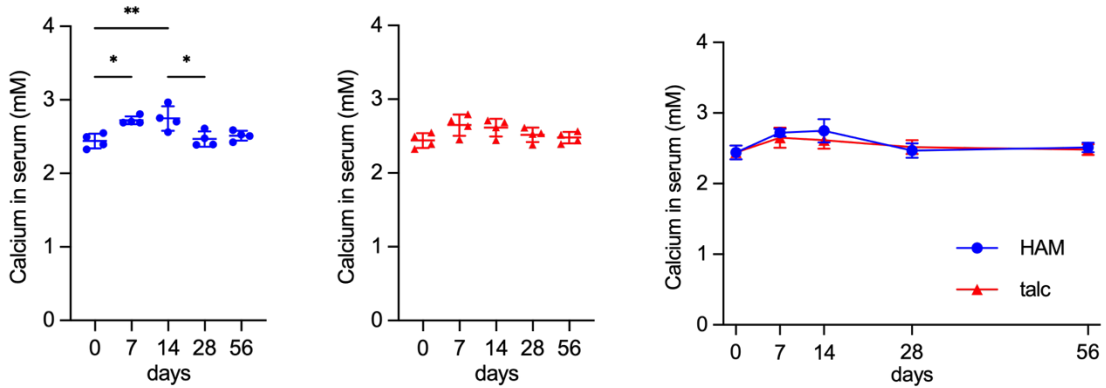

B.

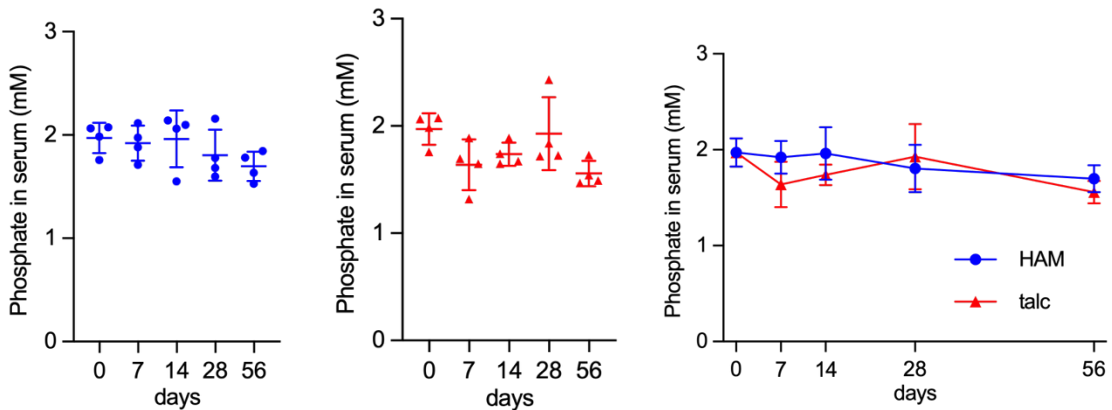

**Supplemental Fig. 7. Serum levels of calcium and phosphate after intrapleural particle challenge.** Serum calcium (A) and phosphate (B) levels were measured at the indicated time points after intrapleural treatment with HAM and talc. Data are mean  $\pm$  SD. Comparisons were by one-way analysis of variance (ANOVA) followed by Tukey's method for multiple group comparisons. \* $P < 0.05$  and \*\* $P < 0.01$

## Supplemental Figure 8

**A.**

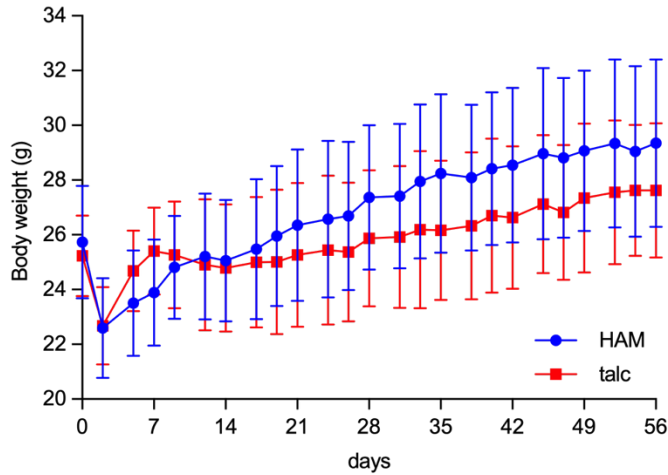

**B.**

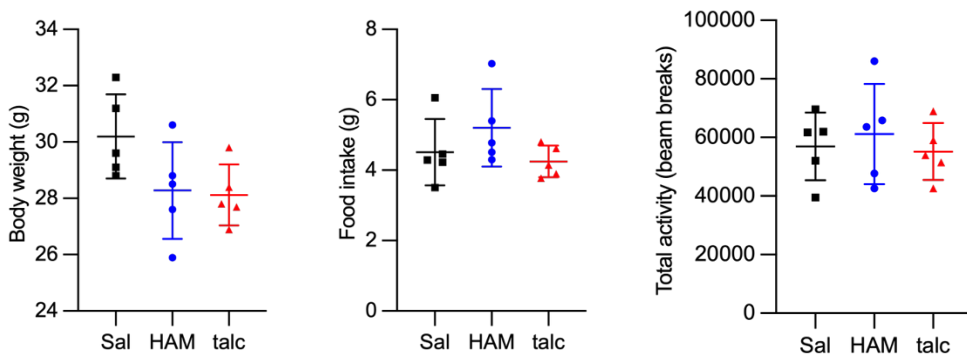

**Supplemental Fig. 8. Physiologic effects of pleurodesis.** (A) Mice weights were obtained 3 times per week over a 56d period after intrapleural challenge with HAM or talc. (B) On day 42, weights, food intake and total activity were compared by one-way analysis of variance (ANOVA) followed by Tukey's method for multiple group comparisons.  $*P < 0.05$ . Data are mean  $\pm$  SD. There were no significant between differences in body weight, food intake or activity levels at day 42.

# Supplemental Figure 9.

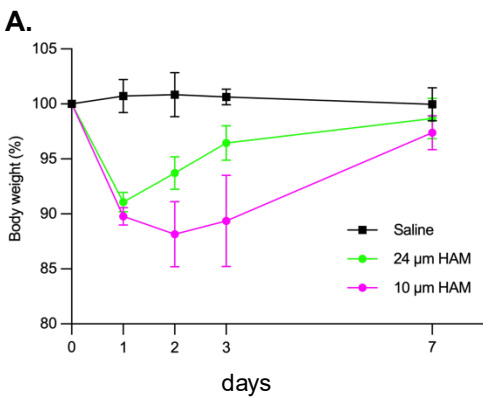

**B.**

|            | 10 μm, 80 mg/mouse, Day 7<br>(Mouse No.1/No. 2/No. 3/No.4)                | 24 μm, 80 mg/mouse, Day 7<br>(Mouse No.1/No. 2/No. 3)            |
|------------|---------------------------------------------------------------------------|------------------------------------------------------------------|
| Lung       | Surface: ++++/++++/++++/++++<br>Interior: -/+/-/+                         | Surface: ++++/++++/++++<br>Interior: +/+/+                       |
| Heart      | Surface: ++++/+++/++++/++++<br>Intravascular: ++/+/+<br>Interior: -/+/-/+ | Surface: +/++++/++++<br>Intravascular: -/-/+<br>Interior: -/+/>+ |
| Chest wall | Surface: ++++/++++/++++/++++<br>Interior: ++/+/+/+                        | Surface: +++/++++/++++<br>Interior: -/-/+                        |
| Diaphragm  | Surface: ++++/++++/++++/++++<br>Interior: -/-/-                           | Surface: ++++/++++/++++<br>Interior: -/-                         |
| Liver      | Surface: -/-/-+<br>Interior: -/-/-                                        | Surface: ++/-<br>Interior: -/-                                   |
| Spleen     | Surface: -/-/-<br>Interior: -/-/-                                         | Surface: ++++/+/-<br>Interior: -/-                               |
| Kidney     | Surface: -/-/-<br>Interior: -/+/-+                                        | Surface: +/-<br>Interior: -/-                                    |
| Peritoneum | Surface: +/-/-+<br>Interior: -/-/+                                        | Surface: ++++//-<br>Interior: -/-                                |
| Brain      | Surface: -/-/-<br>Interior: -/-/-                                         | Surface: -/-<br>Interior: -/-                                    |

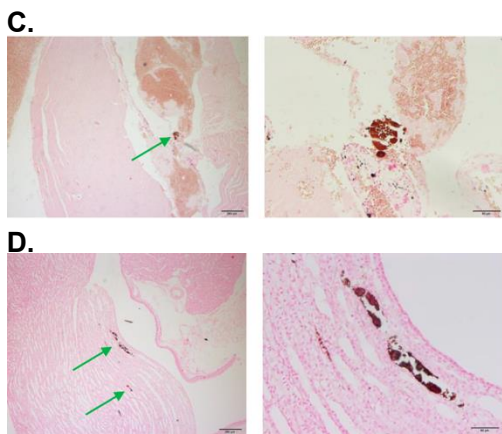

**Supplemental Fig. 9. Size dependence of intrapleural HAM associated weight loss and dissemination.** Intrapleural 10 and 24 μm HAM particles or saline were delivered at time zero and **(A)** weights were obtained at baseline, and days 1,2,3 and 7. Data are mean ± SD. **(B)** On day 7, animals were sacrificed and tissues were harvested for von Kossa staining. The percentage of HAM particle positive sections of all sections surveyed for each mouse was quantified. + = 1-20%, ++ = 21-50%, +++ = 51-75%, ++++ = 76-100%. **(C-D)** Day 7 low power (left panels) and high power (right panels) images of intravascular particles in the heart **(C)** and intraparenchymal particles in the kidney **(D)** demonstrated by von Kossa staining. Corresponds to summary Figure 9.

# Supplemental Figure 10

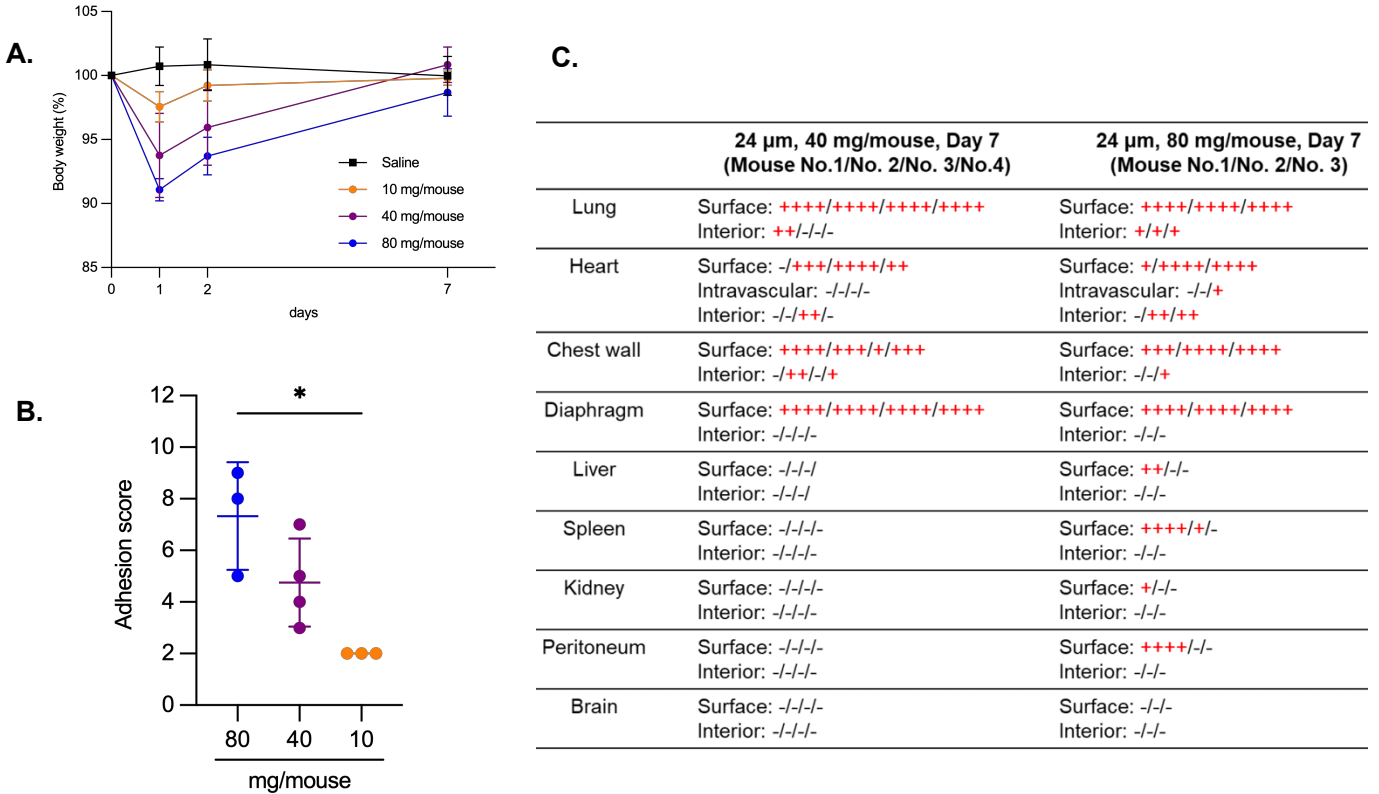

**Supplemental Fig. 10. Dose dependence of intrapleural HAM associated weight loss, adhesion formation and dissemination.** Intrapleural 24  $\mu$ m HAM particles at low (10 mg/mouse), medium (40 mg/mouse) and high doses (80 mg/mouse) or saline (black circle) were delivered to mice at time zero and (A) weights were obtained at baseline, and days 1,2,3 and 7. (B) On day 7, animals were sacrificed and adhesion scores were determined as outlined in Fig 1, and (C) tissues were harvested for von Kossa staining and scoring for the presence of particles. The percentage of HAM particle positive sections of all survey sections surveyed for each mouse was quantified. + = 1-20%, ++ = 21-50%, +++ = 51-75%, ++++ = 76-100%. Data are mean  $\pm$  S.D. \* $P < 0.05$ . Corresponds to summary Figure 9.

# Supplemental Figure 11

A.

|            | 24 $\mu$ m, 80 mg/mouse, Day 7<br>(Mouse No.1/No. 2/No. 3)      | 24 $\mu$ m, 80 mg/mouse, Day 28<br>(Mouse No.1/No. 2/No. 3/No.4)          | 24 $\mu$ m, 80 mg/mouse, Day 84<br>(Mouse No.1/No. 2/No. 3/No.4)      |
|------------|-----------------------------------------------------------------|---------------------------------------------------------------------------|-----------------------------------------------------------------------|
| Lung       | Surface: ++++/++++/++++<br>Interior: +/+/+                      | Surface: ++++/++++/++++/++++<br>Interior: -/+/-+                          | Surface: ++++/++++/++++/++++<br>Interior: ++/-/+/-                    |
| Heart      | Surface: +/++++/++++<br>Intravascular: -/-+<br>Interior: -/+/>+ | Surface: +++/++++/++++/++++<br>Intravascular: -/-/-<br>Interior: -/+/>-/- | Surface: +++/++++/++/++<br>Intravascular: -/-/-<br>Interior: -/+/>-/- |
| Chest wall | Surface: +++/++++/++++<br>Interior: -/-+                        | Surface: ++++/++++/++++/++++<br>Interior: -/+/>-/-                        | Surface: ++/-/+/>++<br>Interior: ++/-/+/>-                            |
| Diaphragm  | Surface: ++++/++++/++++<br>Interior: -/-/-                      | Surface: ++++/++++/++++/++++<br>Interior: -/-/+/>-                        | Surface: ++++/++++/++++/++++<br>Interior: ++/+/--                     |
| Liver      | Surface: ++/-/-<br>Interior: -/-/-                              | Surface: -/-/-/-<br>Interior: -/-/-/-                                     | Surface: -/-/-/-<br>Interior: -/-/-/-                                 |
| Spleen     | Surface: ++++/+/-<br>Interior: -/-/-                            | Surface: -/-/-/-<br>Interior: -/-/-/-                                     | Surface: -/-/-/-<br>Interior: -/-/-/-                                 |
| Kidney     | Surface: +/-/-<br>Interior: -/-/-                               | Surface: +/-/-/-<br>Interior: -/-/-/-                                     | Surface: -/-/-/-<br>Interior: -/-/-/-                                 |
| Peritoneum | Surface: ++++/+/-<br>Interior: -/-/-                            | Surface: -/-/-/-<br>Interior: -/-/-/-                                     | Surface: -/-/-/-<br>Interior: -/-/-/-                                 |
| Brain      | Surface: -/-/-<br>Interior: -/-/-                               | Surface: -/-/-/-<br>Interior: -/-/-/-                                     | Surface: -/-/-/-<br>Interior: -/-/-/-                                 |

B.

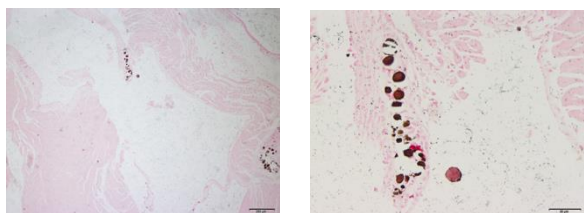

D.

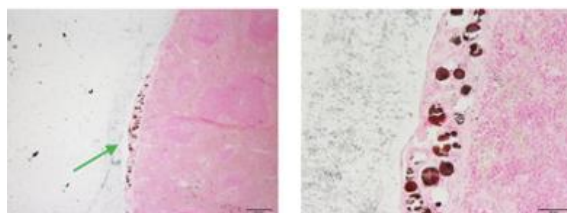

C.

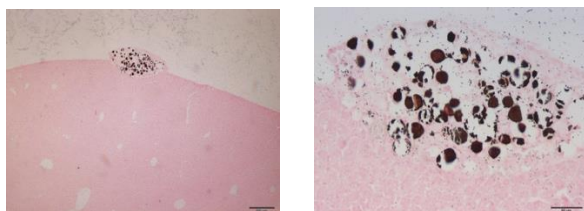

E.

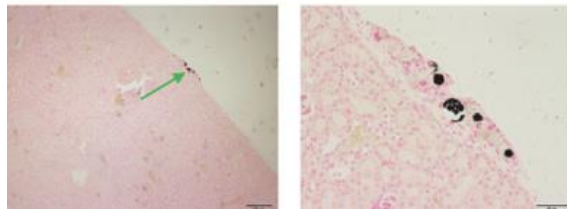

## Supplemental Fig. 11. Time dependent clearance of disseminated HAM particles. (A)

Intravascular 24  $\mu$ m HAM particles were delivered at 80 mg/mouse at time zero. (A) On day 7, 28 and 84, animals were sacrificed and tissues were harvested for von Kossa staining. The percentage of HAM particle positive sections of all sections was quantified. + = 1-20%, ++ = 21-50%, +++ = 51-75%, ++++ = 76-100%. (B-E) Day 7 images of intravascular particles in the heart (B) and particles on the surface of the liver (C), spleen (D) and kidney (E) are shown.

# Supplemental Figure 12

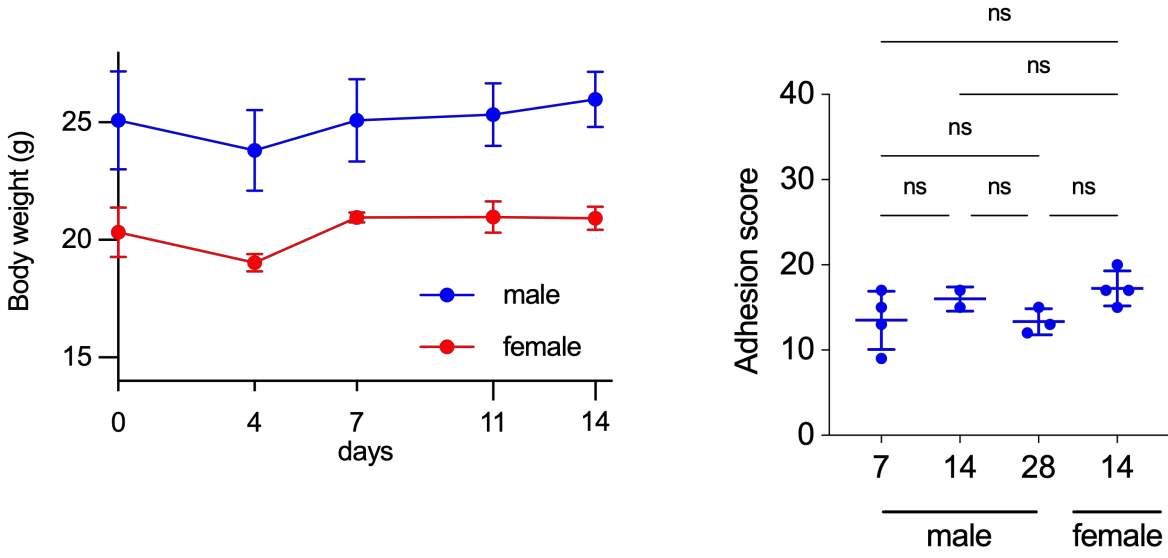

**Supplemental Fig. 12.** Sex differences. Body weight and pleural adhesion formation over time after intrapleural instillation (Fluidinova) HAM particles in male (n= 6) and female (n = 4) mice. Data are mean ± SD., p = ns

## Supplemental Table 1.

| <b>Reagent</b>                | <b>min</b> | <b>max</b> | <b>mean</b> | <b>S.D.</b> |
|-------------------------------|------------|------------|-------------|-------------|
| Laboratory talc               | 4.2        | 15.3       | 8.2         | 2.2         |
| Fluidinova HAM                | 1.9        | 17.1       | 6.0         | 2.7         |
| Steritalc                     | 22.9       | 60.5       | 37.1        | 8.4         |
| Matexcel HAM 10 $\mu\text{m}$ | 7.4        | 28.8       | 13.6        | 3.5         |
| Matexcel HAM 24 $\mu\text{m}$ | 12.6       | 35.9       | 24.8        | 4.4         |

NIH Image J was used to estimate measures particle diameters on scanning electron microscopy images of 100 random particles of each type. Data are expressed in microns ( $\mu\text{m}$ ).

## Supplemental Table 2.

| Species | Body wt (mg) | BSA (m <sup>2</sup> ) | Particle dose (mg) | Particle dose (mg/gm) | Particle dose (mg/m <sup>2</sup> ) |
|---------|--------------|-----------------------|--------------------|-----------------------|------------------------------------|
| human   | 70,000       | 1.730                 | 10000              | 0.142                 | 5780                               |
| mouse   | 20           | .007                  | 40                 | 2.0                   | 5714                               |

**Particle dose calculation**-The dose of talc used in mice (40 mg) was based on the maximum recommended human dose (10 grams) on the Steritalc label corrected for body surface area (1.73 m<sup>2</sup> for humans vs .007 m<sup>2</sup> for mice).

The dosage selection of 2 mg/g body weight (BW) for talc and 4 mg/g BW for nanoXIM-HAp202 (HAM) was based on (i) previously reported doses in the murine pleurodesis model, (ii) differences in particle shape, effective surface area, and formula weight.

Talc (Mg<sub>3</sub>Si<sub>4</sub>O<sub>10</sub>(OH)<sub>2</sub>) forms plate-like, layered crystals; milling exfoliates these layers and markedly increases the external surface. Medical-grade talc typically exhibits an external specific surface area (SSA) of roughly 7–25 m<sup>2</sup>/g. In mice, up to 4 mg/g BW has been used in pleurodesis studies as the experimental dose, but both the literature and our pilot study showed that 2 mg/g BW reproducibly induces pleurodesis while maintaining an acceptable safety margin; this dose was therefore adopted.

The HAM particles we use consists of nearly spherical, dense microspheres. The supplier lists a BET SSA of ≥ 80 m<sup>2</sup>/g for nanoXIM-HAp202, but this value includes internal mesopores accessible to nitrogen gas. Only the particle exterior interacts with pleural cells; for 5–10 μm spheres the geometric external SSA is only ~0.2–0.4 m<sup>2</sup>/g—over an order of magnitude lower than the external SSA of layered talc. In addition, HAM has a molecular weight about 2.9-fold higher than talc, so the number of particles per unit mass is about ~40 % of that of talc. To compensate for both the lower external surface and the lower particle number, the HAM mass was doubled, to 4 mg/g BW.

With these adjustments, HAM at 4 mg/g elicited acute inflammatory responses comparable to talc at 2 mg/g and produced more durable adhesions at 12 weeks.

Collectively, the mass ratio of talc 2 mg/g to HAM 4 mg/g is justified by physicochemical principles and corroborated by the experimental outcomes.

**Supplemental Table 3.**

| Reagent                 | Form                                      | Catalog #                    | Company                  | Location            |
|-------------------------|-------------------------------------------|------------------------------|--------------------------|---------------------|
| TRAP 5b                 | Mouse TRAPTM (TRAP 5b) ELISA Kit          | Cat #: SB-TR103              | Immunodiagnostic Systems | United Kingdom      |
| IL-1β                   | Mouse IL-1 beta DuoSet ELISA Kit          | Cat #: DY40105               | R&D Systems Inc          | Minneapolis, MN     |
| CRP                     | Mouse C-Reactive Protein DuoSet ELISA Kit | Cat #: DY1829                | R&D Systems Inc          | Minneapolis, MN     |
| RANKL                   | Mouse RANK L/TNFSF11 Quantikine ELISA Kit | Cat #: MTR00                 | R&D Systems Inc          | Minneapolis, MN     |
| OPG                     | Mouse OPG/TNFRSF11B ELISA Kit             | Cat #: DY459                 | R&D Systems Inc          | Minneapolis, MN     |
| M-CSF                   | Mouse M-CSF DuoSet ELISA Kit              | Cat #: DY416                 | R&D Systems Inc          | Minneapolis, MN     |
| anti-mouse RANKL        | Monoclonal antibody                       | Cat #: BE0191, Clone IK 22-5 | Bio-X-Cell               | West Lebanon, NH    |
| Rat Ig2a                | Isotype control IgG                       | Cat #: BE0089, Clone 2A-3    | Bio-X-Cell               | West Lebanon, NH    |
| anti-Rabbit IgG         | Secondary antibody                        | Cat # 7074V                  | Cell Signaling           | Danvers, MA         |
| Hydroxyproline          | Assay kit                                 | Cat #: QZBhypro5             | QuickZyme biosciences    | Leiden, Netherlands |
| Type I collagenase      | Enzyme from Clostridium histolyticum      | Cat #: AAJ62406MC            | Thermo Scientific        | Rockford, IL        |
| RNAzol RT               | RNA preparation                           | Cat #: RN 190                | Molecular Research Ctr   | Cincinnati, OH      |
| SYBR Green              | Master Mix for rtPCR                      | Cat #: A25777                | Applied Biosystems       | Beverly, MA         |
| High-capacity cDNA prep | RT kit                                    | Cat #: 43-688-14             | Applied Biosystems       | Beverly, MA         |
| Endotoxin               | LAL Chromogenic Quant Kit                 | Cat #: A39552                | Thermo Scientific        | Rockford, IL        |
| Lewis Lung Ca cells     | LL2-DS-Red labeled                        | Cat #: ATCC CRL-1642         | Gift, Dr. Palumbo, CCHMC | Cincinnati, OH      |
| Steritalc               | Graded mineral particle                   | NDC-62327-444-44             | Boston Medical           | Boston, MA          |
| Talc                    | Ungraded mineral particle                 | Cat #: T2-500                | ThermoFisher             | Fairlawn, N.J.      |
| Hydroxyapatite          | Particle nanoXIM•HAp202                   | CAS No.1306-06-5             | Fluidinova               | Portugal            |
| Hydroxyapatite          | Spherical particles                       | CER-0007                     | Matexcel                 | Shirley, N.J.       |

## Supplemental Table 4.

| Gene      | Primer                         |                                 |
|-----------|--------------------------------|---------------------------------|
|           | Forward                        | Reverse                         |
| Acp5      | 5'-GCCACAGTTATGTTTGTACGTG-3'   | 5'-ACAGATTGCATACTCTAAGATCTCC-3' |
| Acta2     | 5'-CTGTTATAGGTGGTTTCGTGG A-3'  | 5'-GAGCTACGAACTGCCTGAC-3'       |
| Actb      | 5'-ACCTTCTACAATGAGCTGCG-3'     | 5'-CTGGATGGCTACGTACATGG-3'      |
| Atp6v0d2  | 5'-GCCAAATGAGTTCAGAGTGATG-3'   | 5'-AGTCTTACCTTGAGGCATTCTAC-3'   |
| Col1α1    | 5'-CATTGTGTATGCAGCTGACTTC-3'   | 5'-CGCAAAGAGTCTACATGTCTAGG-3'   |
| Col3α     | 5'-TCTCTAGACTCATAGGACTGACC-3'  | 5'-TTCTTCTACCCTTCTTCATCC-3'     |
| Csfl      | 5'-GGAAGATGGTAGGAGAGGGTA-3'    | 3'-AGGATGAGGACAGACAGGT-5'       |
| Csflr     | 5'-AGGTGTAGCTATTGCCTTCG-3'     | 5'-TGTATGTCTGTCATGTCTCTGC-3'    |
| Ctsk      | 5'-ATCTCTCTGTACCCTCTGCAT-3'    | 5'-GACTCTGAAGATGCTTACCCA-3'     |
| Fn1       | 5'-TTGTTTCGTAGACTGGAGAC-3'     | 5'-GAGCTATCCATTTACCTTCAGA-3'    |
| Itgb3     | 5'-ACAGTCATCCTCGTTCTTGTAG -3'  | 5'-GAACGCTCCATGAAGAAAACAC-3'    |
| Mmp9      | 5'-GTGGGAGGTATAGTGGGACA-3'     | 5'-GACATAGACGGCATCCAGTATC-3'    |
| Tgfb1     | 5'-CCGAATGTCTGACGTATTGAAGA-3'  | 5'-GCGGACTACTATGCTAAAGAGG-3'    |
| Tnfsf11   | 5'-AGTGCTGTCTTCTGATATTCTGT -3' | 5'-TCCCGCTCCATGTTCCCT-3'        |
| Tnfrsf11a | 5'-CACTGTCCGAGGTAGGAGT-3'      | 5'-CAGGAGAGGCATTATGAGCAT-3'     |
| Tnfrsf11b | 5'-ATGCAACACATGACAACGTG-3'     | 5'-TGGTATAATCTTGGTAGGAACAGC-3'  |

### Supplemental Table 4. Primers for quantitative RT-qPCR

Acp5, acid phosphatase 5; Acta2, actin  $\alpha$ -2 smooth muscle; Actb,  $\beta$ -actin; Atp6v0d2, ATPase H<sup>+</sup> transporting v0 subunit d2; Col1 $\alpha$ 1, collagen 1 $\alpha$ -1; Col3 $\alpha$ 1, collagen 3 $\alpha$ -1; Csfl, colony stimulating factor 1; Csflr, Csfl receptor; Ctsk, cathepsin K; Fn1, fibronectin 1; Itgb3, Integrin  $\beta$ 3; Mmp9, matrix metalloproteinase 9; Tgfb1, transforming growth factor- $\beta$ 1; Tnfsf11, tumor necrosis factor receptor superfamily member 11; Tnfrsf11a, tumor necrosis factor receptor superfamily member 11a; Tnfrsf11b, tumor necrosis factor receptor superfamily member 11B.
